# Supplementary material for: Cryptic Species Diversification of the Pedicularis siphonantha Complex (Orobanchaceae) in the Mountains of Southwest China Since the Pliocene
Source: Front Plant Sci. 2022 Mar 24;13:811206. doi: 10.3389/fpls.2022.811206 (PMC8987768; doi:10.3389/fpls.2022.811206)
Supplement: Supplementary file 1 [file Table_1.XLSX]

## Sheet: Sheet1
Table S1 ：Taxon sampling imformation
	Total length (bp)	population	Taxon	Group	Taxon	Voucher information	Sources	ITS	matK	rbcL	trnH-psbA	trnL-F
1	4452	K	P. humilis LR1208	P. siphonantha complex	P. humilis Bonati	Li et al. 1208 (KUN)	Yunnan, Dulongjiang, Gaoligong Mountain	OL583884	OL540307	NA	OL505608	OL505656
2	5407	C	S35 P. dolichosiphon LIDZ 0991	P. siphonantha complex	P. dolichosiphon H.L.Li	Yu et al., LIDZ0991 (KUN)	Yunnan, Ninglang, Yongning	JF977723	JF955314	JF943206	JN046137	KT022970
3	5952	L4	S57 P. delavayi HW10130	P. siphonantha complex	P. delavayi Franch. ex Maxim.	Yu et al., HW10130 (KUN)	Yunnan, Shangeri-La, Shika Mountain	JN120023	JN120031	JN120038	JN120048	NA
4	5979	L3	S58 P. delavayi HW10172	P. siphonantha complex	P. delavayi Franch. ex Maxim.	Yu et al., HW10172 (KUN)	Yunnan, Shangeri-La, Hong Mountain	JN120024	JN120032	JN120039	JN120049	NA
5	6284	L5	S59 P. delavayi HW10200	P. siphonantha complex	P. delavayi Franch. ex Maxim.	Yu et al., HW10200 (KUN)	Yunnan, Shangeri-La, DaXue Mountain	OL583926	OL540349	OL540397	OL505650	OL505697
6	5993	L1	S60 P. delavayi HW10316	P. siphonantha complex	P. delavayi Franch. ex Maxim.	Yu et al., HW10316 (KUN)	Sichuan, Kangding, Zheduo Mountain	JN120025	JN120033	JN120040	JN120050	NA
7	6064	L2	S61 P. delavayi LIDZ-1116	P. siphonantha complex	P. delavayi Franch. ex Maxim.	Yu et al., LIDZ-1116 (KUN)	Sichuan, Jiulong	JN120026	JN120034	JN120041	JN120051	KF277636
8	6149	L5	S62 P. delavayi LIDZ-1258	P. siphonantha complex	P. delavayi Franch. ex Maxim.	Yu et al., LIDZ-1258 (KUN)	Yunnan, Shangeri-La, DaXue Mountain	OL583927	OL540350	OL540398	OL505651	OL505698
9	6277	L7	S63 P. delavayi LHD2013-01	P. siphonantha complex	P. delavayi Franch. ex Maxim.	Yu et al., LHD2013-01 (KUN)	Yunnan, Lijiang, Yulongxueshan	OL583928	OL540351	OL540399	OL505652	OL505699
10	6287	L7	S64 P. delavayi LHD2013-20	P. siphonantha complex	P. delavayi Franch. ex Maxim.	Yu et al., LHD2013-20 (KUN)	Yunnan, Lijiang, Yulongxueshan	OL583929	OL540352	OL540400	OL505653	OL505700
11	6224	L7	S65 P. delavayi LHD2013-40	P. siphonantha complex	P. delavayi Franch. ex Maxim.	Yu et al., LHD2013-40 (KUN)	Yunnan, Lijiang, Yulongxueshan	OL583930	OL540353	OL540401	OL505654	OL505701
12	6451	J1	S01 P. dolichantha HW10371A	P. siphonantha complex	P. dolichantha Bonati	Yu et al., HW10371A (KUN)	Yunnan, Huize, Dahai	OL583887	OL540310	OL540357	OL505611	OL505659
13	6333	J2	S02 P. dolichantha HW10371	P. siphonantha complex	P. dolichantha Bonati	Yu et al., HW10371 (KUN)	Yunnan, Huize, Dahai	OL583888	OL540311	OL540358	OL505612	OL505660
14	6386	B1	S04 P. leptosiphon 098	P. siphonantha complex	P. leptosiphon H.L. Li	Wang et al., 07ML098 (KUN)	Sichuan, Muli, Changhaizi	KF277556	KT022602	KT022776	NA	KF277672
15	6176	B2	S05 P. leptosiphon 1008	P. siphonantha complex	P. leptosiphon H.L. Li	Yu et al., 1008 (KUN)	Sichuan, Muli, Kangwu Temple	OL583889	OL540312	OL540359	OL505613	OL505661
16	4200	F7	S10 P. milliana 03-021	P. siphonantha complex	P. milliana H. Wang & W. B. Yu	Yu et al., 03-021 (KUN)	Yunnan, Shangeri-La, Dabaosi	OL583891	OL540314	OL540361	OL505615	NA
17	4228	F2	S11 P. milliana 03-059	P. siphonantha complex	P. milliana H. Wang & W. B. Yu	Yu et al., 03-059 (KUN)	Yunnan, Deqin, Baima Mountain	OL583892	OL540315	OL540362	OL505616	NA
18	6101	F2	S12 P. milliana 03-060	P. siphonantha complex	P. milliana H. Wang & W. B. Yu	Yu et al., 03-060 (KUN)	Yunnan, Deqin, Baima Mountain	OL583893	OL540316	OL540363	OL505617	OL505663
19	5319	F2	S16 P. milliana 08812	P. siphonantha complex	P. milliana H. Wang & W. B. Yu	Yu et al., 8812 (KUN)	Yunnan, Deqin, Baima Mountain	NA	OL540319	OL540365	OL505619	OL505665
20	6275	F1	S17 P. milliana 08836	P. siphonantha complex	P. milliana H. Wang & W. B. Yu	Yu et al., 8836 (KUN)	Yunnan, Deqin, Baima Mountain	OL583894	OL540320	OL540366	OL505620	OL505666
21	3239	F12	S18 P. milliana H-672	P. siphonantha complex	P. milliana H. Wang & W. B. Yu	Zhang et al., H672 (KUN)	Yunnan, Lijiang, Yulong Mountain	OL583895	NA	OL540367	OL505621	OL505667
22	5839	F10	S20 P. milliana HW10095	P. siphonantha complex	P. milliana H. Wang & W. B. Yu	Yu et al., HW10095 (KUN)	Yunnan, Shangeri-La, Tianbao Mountain	OL583897	OL540321	OL540368	OL505622	OL505668
23	6150	F9	S21 P. milliana HW10122	P. siphonantha complex	P. milliana H. Wang & W. B. Yu	Yu et al., HW10122 (KUN)	Yunnan, Shangeri-La, Xiaozhongdian	OL583898	OL540322	OL540369	OL505623	OL505669
24	5982	F8	S22 P. milliana HW10141	P. siphonantha complex	P. milliana H. Wang & W. B. Yu	Yu et al., HW10141 (KUN)	Yunnan, Shangeri-La, Shika Mountain	OL583899	OL540323	OL540370	OL505624	OL505670
25	6098	F7	S23 P. milliana HW10147	P. siphonantha complex	P. milliana H. Wang & W. B. Yu	Yu et al., HW10147 (KUN)	Yunnan, Shangeri-La	OL583900	OL540324	OL540371	OL505625	OL505671
26	6291	F6	S24 P. milliana HW10156	P. siphonantha complex	P. milliana H. Wang & W. B. Yu	Yu et al., HW10156 (KUN)	Yunnan, Shangeri-La, Dabaosi	OL583901	OL540325	OL540372	OL505626	OL505672
27	6205	F4	S25 P. milliana HW10163	P. siphonantha complex	P. milliana H. Wang & W. B. Yu	Yu et al., HW10163 (KUN)	Yunnan, Shangeri-La, Hong Mountain	OL583902	OL540326	OL540373	OL505627	OL505673
28	6192	F5	S26 P. milliana HW10173	P. siphonantha complex	P. milliana H. Wang & W. B. Yu	Yu et al., HW10173 (KUN)	Yunnan, Shangeri-La, Hong Mountain	OL583903	OL540327	OL540374	OL505628	OL505674
29	5196	F3	S28 P. milliana HW10188	P. siphonantha complex	P. milliana H. Wang & W. B. Yu	Yu et al., HW10188 (KUN)	Yunnan, Shangeri-La, DaXue Mountain	OL583905	OL540329	OL540376	NA	OL505676
30	3299	F11	S53 P. milliana LIDZ-1580	P. siphonantha complex	P. milliana H. Wang & W. B. Yu	Yu et al., LIDZ-1580 (KUN)	Yunnan, Lijiang, Yulong Mountain	JF977725	KT022664	JF943208	JN046139	KC733351
31	3263	F14	P. milliana TH2018106	P. siphonantha complex	P. milliana H. Wang & W. B. Yu	Tang et al., TH2018106 (KUN)	Yunnan, Shangeri-La, Haba Mountain	OL583885	OL540308	OL540355	OL505609	OL505657
32	3182	F13	S55 P. milliana YWB-003	P. siphonantha complex	P. milliana H. Wang & W. B. Yu	Yu et al., YWB-003 (KUN)	Yunnan, Lijiang, Yuhu	OL583925	OL540348	OL540396	OL505649	OL505696
33	5357	G1	S07 Pedicularis sp. 1 LIDZ-15841-1	P. siphonantha complex	P. yulongensis sp. nov.	Yu et al., LIDZ1584 (KUN)	Yunnan, Lijiang, Ganheba	JF977718	JF955309	JF943201	JN046132	KF277726
34	5965	H1	S06 P. sigmoidea HW10015	P. siphonantha complex	P. sigmoidea Franch. ex Maxim.	Yu et al., HW10015 (KUN)	Yunnan, Eryuan, Gualapo	OL583890	OL540313	OL540360	OL505614	OL505662
35	5144	H2	P. sigmoidea YWB2014059	P. siphonantha complex	P. sigmoidea Franch. ex Maxim.	Yu et al., YWB2014059 (KUN)	Yunnan, Eryuan, Maer Mountain	KT022493	KT022650	KT022830	NA	KT022957
36	6078	D1	S13 P. siphonantha 081176	P. siphonantha complex	P. siphonantha D. Don	Zhang and He, 081176 (KUN)	Xiznag, Niemula, Zhangmu	JF977727	JF955317	JF943210	JN046141	KT022960
37	6087	D2	S14 P. siphonantha 081185	P. siphonantha complex	P. siphonantha D. Don	Zhang and He, 081185 (KUN)	Xiznag, Niemula, Zhangmu	JF977726	JF955316	JF943209	JN046140	KT022961
38	6043	D3	S15 P. siphonantha 081423	P. siphonantha complex	P. siphonantha D. Don	Zhang and He, 081423 (KUN)	Xizang, Cuona, Lebugou	KT022496	KT022653	KT022833	NA	KT022962
39	4972	D4	P. siphonantha GLM123702	P. siphonantha complex	P. siphonantha D. Don	Gao et al., GLM123702 (KUN)	Xizang, Linzhi, Sejila Mountain	KT022496	KT022653	KT022833	NA	KT022962
40	6310	E2	S19 Pedicularis sp. 2 HP9267	P. siphonantha complex	P. jiaozishanensis sp. nov.	Yu et al., HP9267 (KUN)	Yunnan, Luquan, Jiaozi Mountain	OL583896	NA	OL540367	OL505621	OL505667
41	6066	E1	S52 Pedicularis sp. 2 LIDZ-1518	P. siphonantha complex	P. jiaozishanensis sp. nov.	Yu et al., LIDZ1518 (KUN)	Yunnan, Dongchuan, Jiaozi Mountain	JF977724	JF955315	JF943207	JN046138	KT022971
42	5591	E3	Pediculari sp. 2 TH2018040	P. siphonantha complex	P. jiaozishanensis sp. nov.	Tang et al., TH2018040 (KUN)	Yunnan, Dongchuan, Jiaozi Mountain	OL583886	OL540309	OL540356	OL505610	OL505658
43	6222	A19	S27 P. tenuituba HW10187	P. siphonantha complex	P. tenuituba H.L.Li	Yu et al., HW10187 (KUN)	Yunnan, Shangeri-La, DaXue Mountain	OL583904	OL540328	OL540375	OL505629	OL505675
44	6037	A18	S29 P. tenuituba HW10218	P. siphonantha complex	P. tenuituba H.L.Li	Yu et al., HW10218 (KUN)	Sichuan, Xiangcheng, Ranwu, Rewu	JF977729	JF955319	JF943212	JN046143	NA
45	6094	A2	S30 P. tenuituba HW10244	P. siphonantha complex	P. tenuituba H.L.Li	Yu et al., HW10244 (KUN)	Sichuan, Batang, Deda	OL583906	OL540330	OL540377	OL505630	OL505677
46	6098	A1	S31 P. tenuituba HW10251	P. siphonantha complex	P. tenuituba H.L.Li	Yu et al., HW10251 (KUN)	Sichuan, Batang, Haizi Mountain	OL583907	OL540331	OL540378	OL505631	OL505678
47	6087	A3	S32 P. tenuituba HW10254	P. siphonantha complex	P. tenuituba H.L.Li	Yu et al., HW10254 (KUN)	Sichuan, Litang, Haizai Mountain	OL583908	OL540332	OL540379	OL505632	OL505679
48	6143	A5	S33 P. tenuituba HW10301	P. siphonantha complex	P. tenuituba H.L.Li	Yu et al., HW10301 (KUN)	Sichuan, Yajiang, Jianziwan Mountain	OL583909	OL540333	OL540380	OL505633	OL505680
49	6019	A7	S34 P. tenuituba HW10327	P. siphonantha complex	P. tenuituba H.L.Li	Yu et al., HW10327 (KUN)	Sichuan, Yajiang, Gaoersi Mountain	OL583910	OL540334	OL540381	OL505634	OL505681
50	6046	A13	S36 P. tenuituba LIDZ-0997	P. siphonantha complex	P. tenuituba H.L.Li	Yu et al., LIDZ-0997 (KUN)	Sichuan, Muli, Changhaizi	OL583911	OL540335	OL540382	OL505635	OL505682
51	6111	A11	S37 P. tenuituba LIDZ-1089	P. siphonantha complex	P. tenuituba H.L.Li	Yu et al., LIDZ-1089 (KUN)	Sichuan, Kangding	OL583912	OL540336	OL540383	OL505636	OL505683
52	6096	A12	S38 P. tenuituba LIDZ-1103	P. siphonantha complex	P. tenuituba H.L.Li	Yu et al., LIDZ-1103 (KUN)	Sichuan, Jiulong	OL583913	OL540337	OL540384	OL505637	OL505684
53	6111	A10	S39 P. tenuituba LIDZ-1147	P. siphonantha complex	P. tenuituba H.L.Li	Yu et al., LIDZ-1147 (KUN)	Sichuan, Kangding	OL583914	OL540338	OL540385	OL505638	OL505685
54	6104	A9	S40 P. tenuituba LIDZ-1163	P. siphonantha complex	P. tenuituba H.L.Li	Yu et al., LIDZ-1163 (KUN)	Sichuan, Dafu	OL583915	OL540339	OL540386	OL505639	OL505686
55	6078	A9	S41 P. tenuituba LIDZ-1166	P. siphonantha complex	P. tenuituba H.L.Li	Yu et al., LIDZ-1166 (KUN)	Sichuan, Dafu	OL583916	OL540340	OL540387	OL505640	OL505687
56	6210	A8	S42 P. tenuituba LIDZ-1179	P. siphonantha complex	P. tenuituba H.L.Li	Yu et al., LIDZ-1179 (KUN)	Sichuan, Dafu, Geka	OL583917	OL540341	OL540388	OL505641	OL505688
57	5766	A6	S43 P. tenuituba LIDZ-1199	P. siphonantha complex	P. tenuituba H.L.Li	Yu et al., LIDZ-1199 (KUN)	Sichuan, Yajiang, Jianziwan Mountain	OL583918	OL540342	OL540389	OL505642	OL505689
58	5666	A6	S44 P. tenuituba LIDZ-1203	P. siphonantha complex	P. tenuituba H.L.Li	Yu et al., LIDZ-1203 (KUN)	Sichuan, Yajiang, Jianziwan Mountain	OL583919	OL540343	OL540390	OL505643	OL505690
59	6104	A4	S46 P. tenuituba LIDZ-1218	P. siphonantha complex	P. tenuituba H.L.Li	Yu et al., LIDZ-1218 (KUN)	Sichuan, Litang, Cunge	OL583920	OL540344	OL540391	OL505644	OL505691
60	6180	A15	S47 P. tenuituba LIDZ-1229	P. siphonantha complex	P. tenuituba H.L.Li	Yu et al., LIDZ-1229 (KUN)	Sichuan, Daocheng	OL583921	OL540345	OL540392	OL505645	OL505692
61	6110	A16	S48 P. tenuituba LIDZ-1233	P. siphonantha complex	P. tenuituba H.L.Li	Yu et al., LIDZ-1233 (KUN)	Sichuan, Daocheng	OL583922	OL540346	OL540393	OL505646	OL505693
62	6111	A17	S49 P. tenuituba LIDZ-1239	P. siphonantha complex	P. tenuituba H.L.Li	Yu et al., LIDZ-1239 (KUN)	Sichuan, Xiangcheng, Weming Mountain	OL583923	OL540347	OL540394	OL505647	OL505694
63	4706	A14	S50 P. tenuituba LIDZ-1247	P. siphonantha complex	P. tenuituba H.L.Li	Yu et al., LIDZ-1247 (KUN)	Sichuan, Daocheng, Chitu	OL583924	NA	OL540395	OL505648	OL505695
64	6050	A19	S51 P. tenuituba LIDZ-1270	P. siphonantha complex	P. tenuituba H.L.Li	Yu et al., LIDZ1270 (KUN)	Yunnan, Shangeri-La, DaXue Mountain	JF977730	JF955320	JF943213	JN046144	KF277728
65	6058	I2	S66 P. variegata 07-ML-101A	P. siphonantha complex	P. variegata H.L. Li	Wang et al., 07-ML-101A (KUN)	Sichuan, Muli, Changhaizi	JF977780	JF955369	JF943263	JN046193	KF277759
66	6003	I1	S67 P. variegata 07-ML-101B	P. siphonantha complex	P. variegata H.L. Li	Wang et al., 07-ML-101B (KUN)	Sichuan, Muli, Changhaizi	OL583931	OL540354	OL540402	OL505655	OL505702
67	5846		P. amplituba LIDZ1519	Outgroups	P. amplituba H.L. Li	Yu et al., LIDZ1519A (KUN)		JF977469	JF955063	JF942952	JN045887	KF277605
68	5825		P. cephalantha JW08727	Outgroups	P. cephalantha Franch. ex Maxim.	W. Jiang, 08727 (KUN)		JF977493	JF955087	JF942976	JN120044	KF277613
69	5823		P. fengii Yu606	Outgroups	P. fengii H.L. Li	Yu et al., Yu606 (KUN)		JF977564	JF955157	JF943047	JN045980	KF277646
70	4963		P. macilenta LH8484	Outgroups	P. macilenta Franch. ex Forbes ex Hemsl.	Li et al., 8484 (KUN)		KF277558	KT022606	KT022780	NA	KF277680
71	4976		P. mychophila STET1396	Outgroups	P. mychophila Marq. & Shaw	Jin et al., STET1396 (PE)		KF277564	KT022613	KT022788	NA	KF277691
72	5864		P. obliquigaleata LIDZ1271	Outgroups	P. obliquigaleata W.B. Yu & H. Wang	Yu et al., LIDZ1271 (KUN)		KF277566	KT022615	KT022790	NA	KF277694
73	4977		P. rhizomatosa 451	Outgroups	P. rhizomatosa P. C. Tsoong	Yang et al., 451 (KUN)		KT022486	KT022638	KT022817	NA	KT022949
74	5878		P. tachanensis LIDZ1062	Outgroups	P. tachanensis Bonati	Yu et al., LIDZ1062 (KUN)		JF977743	JF955333	JF943226	JN046157	KF277740
75	5783		P. tahaiensis HP9544	Outgroups	P. tahaiensis Bonati	Xiang et al., HP9544 (KUN)		JF977552	JF955145	JF943035	JN045968	KF277741
76	4980		P. tayloriana 354	Outgroups	P. tayloriana P. C. Tsoong	Yang et al. 354 (KUN)		KT022512	KT022679	KT022858	NA	KT022981
77	5435		P. axillaris LIDZ1290(KUN)	Outgroups	P. axillaris Franch. ex Maxim.	Yu et al., LIDZ1290 (KUN)		JF977478	JF955072	JF942961	JN045896	KC733345
78	5530		P. axillaris LIDZ1205(KUN)	Outgroups	P. axillaris Franch. ex Maxim.	Yu et al., LIDZ1205 (KUN)		JF977624	JF955216	JF943107	JN046038	KT022882
